# Supplementary material for: Comparison of incident hypertension between SGLT2 inhibitors vs. DPP4 inhibitors
Source: Springer Nature journal article supplement (doi:10.1038/s41440-024-01649-z), 2024-04-10

# Supplementary Figure 1. Study design

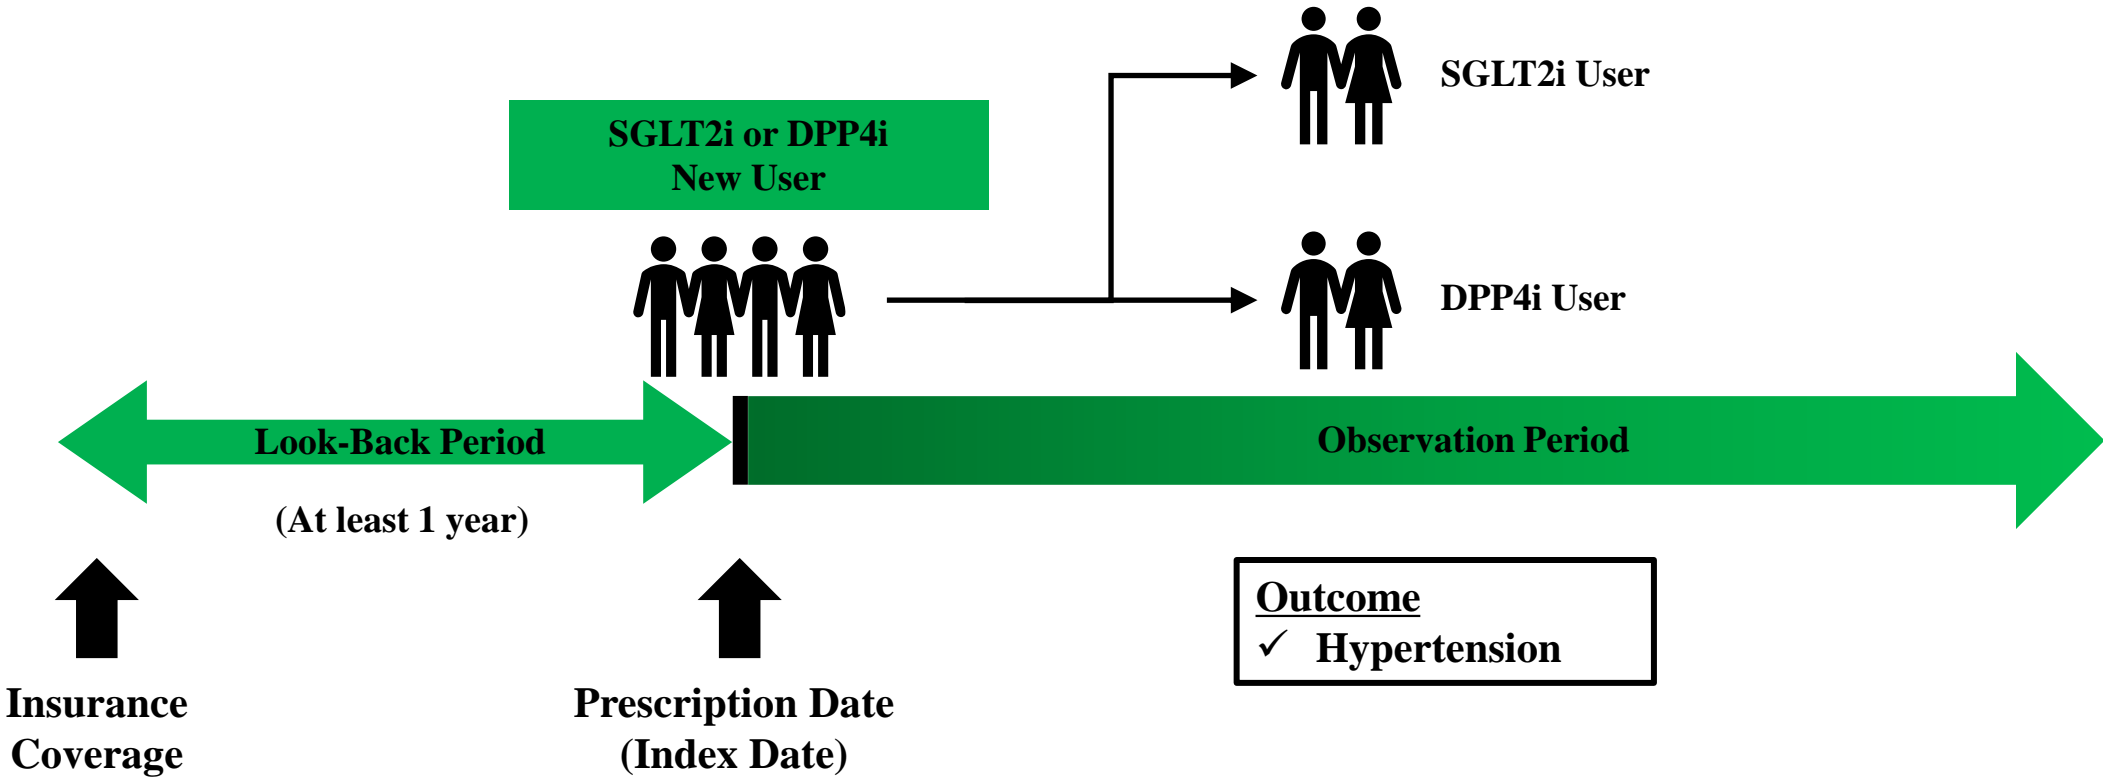

Supplement: MOESM1 [file 41440_2024_1649_MOESM1_ESM.pdf]
